# Supplementary material for: Luteolin Reduces Aqueous Extract PM2.5-induced Metastatic Activity in H460 Lung Cancer Cells
Source: PubMed Central journal article supplement (PMC9515691; doi:10.7150/ijms.73947), 2022-08-21
Supplement: ijmsv19p1502s1.pdf [file ijmsv19p1502s1.pdf]

**Supplementary Table 1.** The analysis of PM<sub>2.5</sub> samples in the South District of Taichung City from August 2017 and May 2018.

| <b>Metal</b> | <b>Concentration<br/>(<math>\mu\text{g/g PM}_{2.5}</math>)</b> | <b>Metal</b> | <b>Concentration<br/>(<math>\mu\text{g/g PM}_{2.5}</math>)</b> |
|--------------|----------------------------------------------------------------|--------------|----------------------------------------------------------------|
| Ga           | 0.034                                                          | Se           | 0.110                                                          |
| Ag           | < 0.003                                                        | In           | < 0.003                                                        |
| Cd           | 0.036                                                          | Hg           | N.D.                                                           |
| Sn           | 0.071                                                          | Pb           | 0.769                                                          |
| Ba           | 0.486                                                          | Cu           | 4.07                                                           |
| B            | 0.517                                                          | Al           | 8.95                                                           |
| V            | 0.688                                                          | Ca           | 27.0                                                           |
| Ni           | 0.521                                                          | Zn           | 7.31                                                           |
| Co           | 0.020                                                          | Fe           | 25.4                                                           |
| Cr           | 0.426                                                          | Mg           | 6.10                                                           |
| As           | 0.154                                                          | Mn           | 3.08                                                           |

N.D., not detected.
